# Supplementary material
Source: PubMed Central journal article supplement (PMC3405839)
Supplement: auto-8-650-s01.pdf [file auto-8-650-s01.pdf]

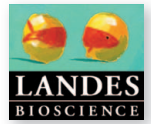

**Supplemental Material to:**

**Delk NA, Farach-Carson MC**

**Interleukin-6: A Bone Marrow Stromal Cell Paracrine  
Signal that Induces Neuroendocrine Differentiation and  
Modulates Autophagy in Bone Metastatic PCa Cells**

**Autophagy 2012; 8(4); [http://dx.doi.org/10.4161/  
auto.8.4.19226](http://dx.doi.org/10.4161/auto.8.4.19226)**

**[www.landesbioscience.com/journals/autophagy/article/19226](http://www.landesbioscience.com/journals/autophagy/article/19226)**

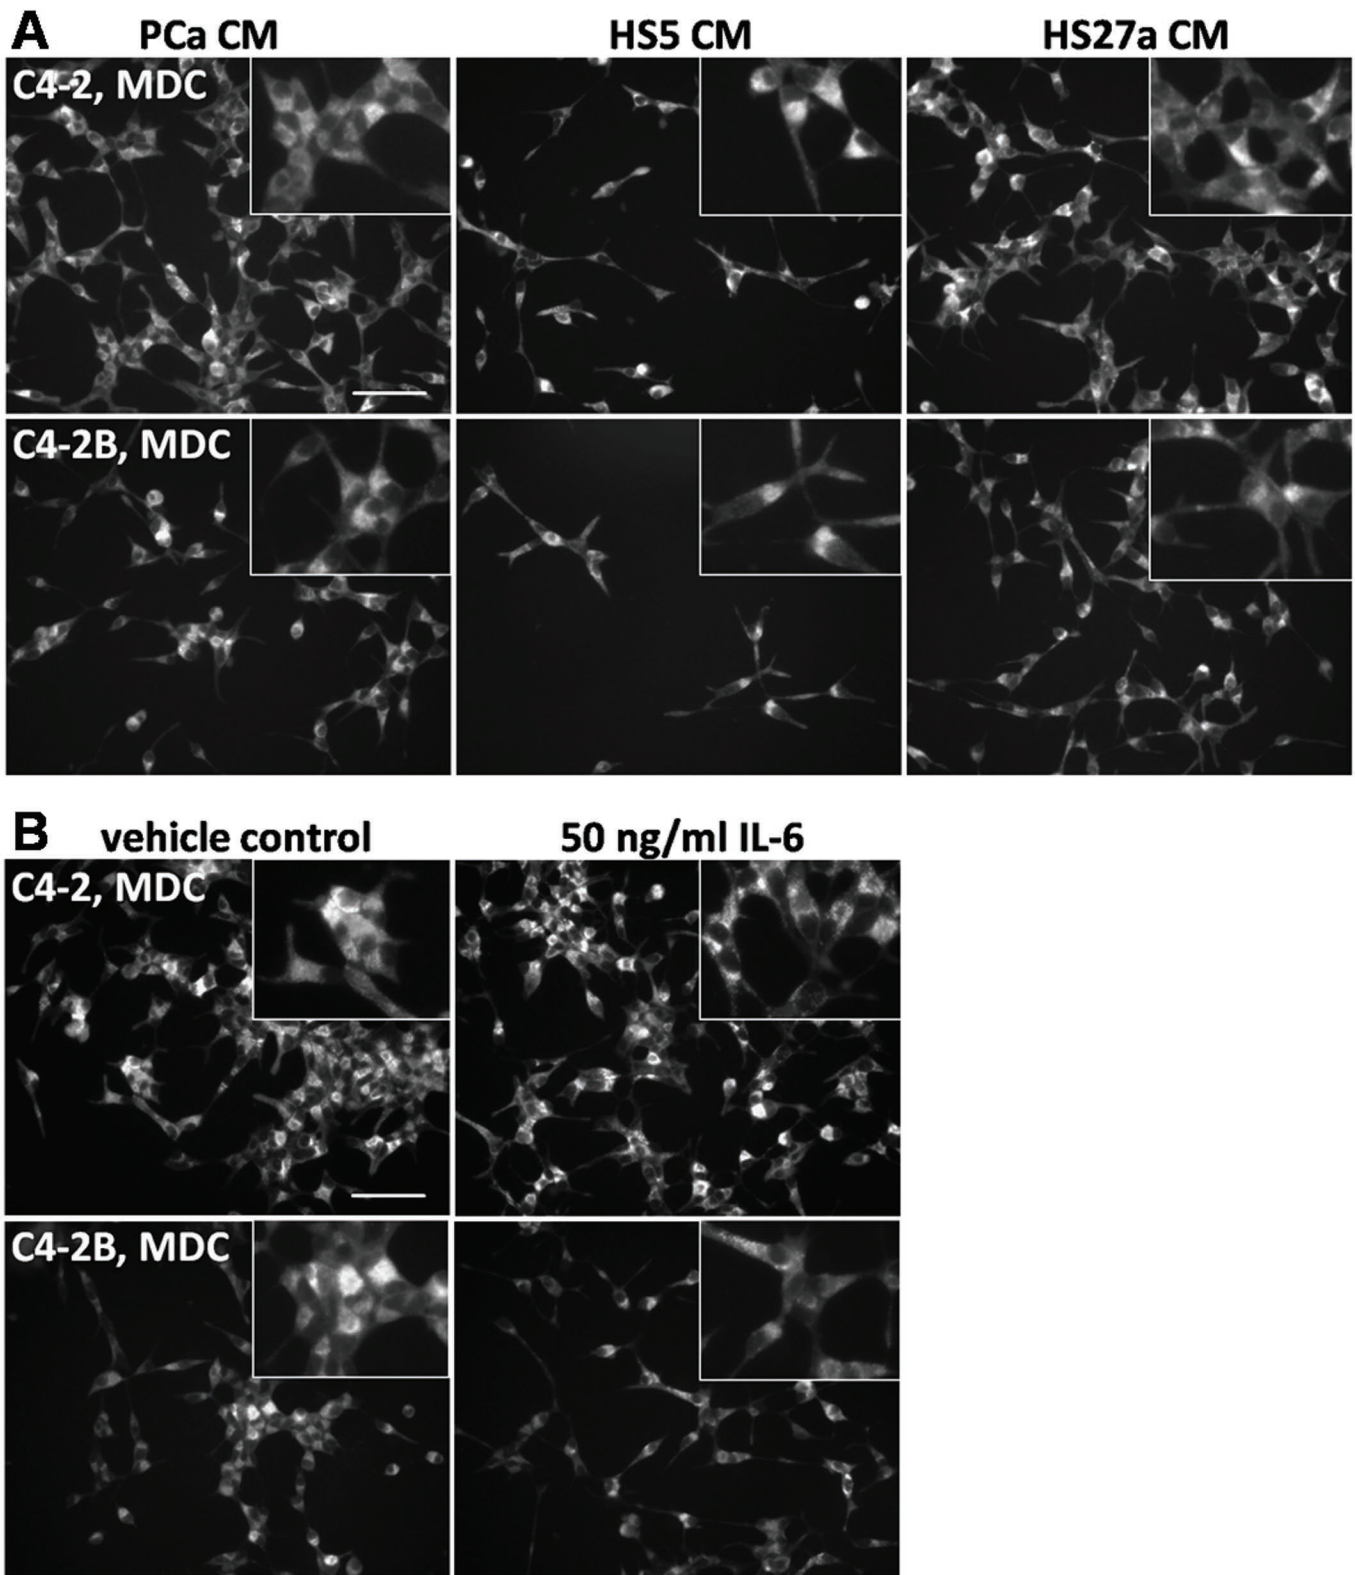

Supplemental Figure 1. MDC staining of AVOs in C4-2 and C4-2B cells treated with conditioned media or IL-6. C4-2 or C4-2B cells were treated with (A) conditioned media or (B) 50 ng/ml IL-6 for 3 days, stained with MDC, and imaged live using fluorescence microscopy (DAPI filter, 20x magnification, scale bar = 100  $\mu$ M).
